# Supplementary material
Source: MDPI journal article supplement (https://www.mdpi.com/2072-4292/15/10/2593)
Supplement: s1 [file s1]

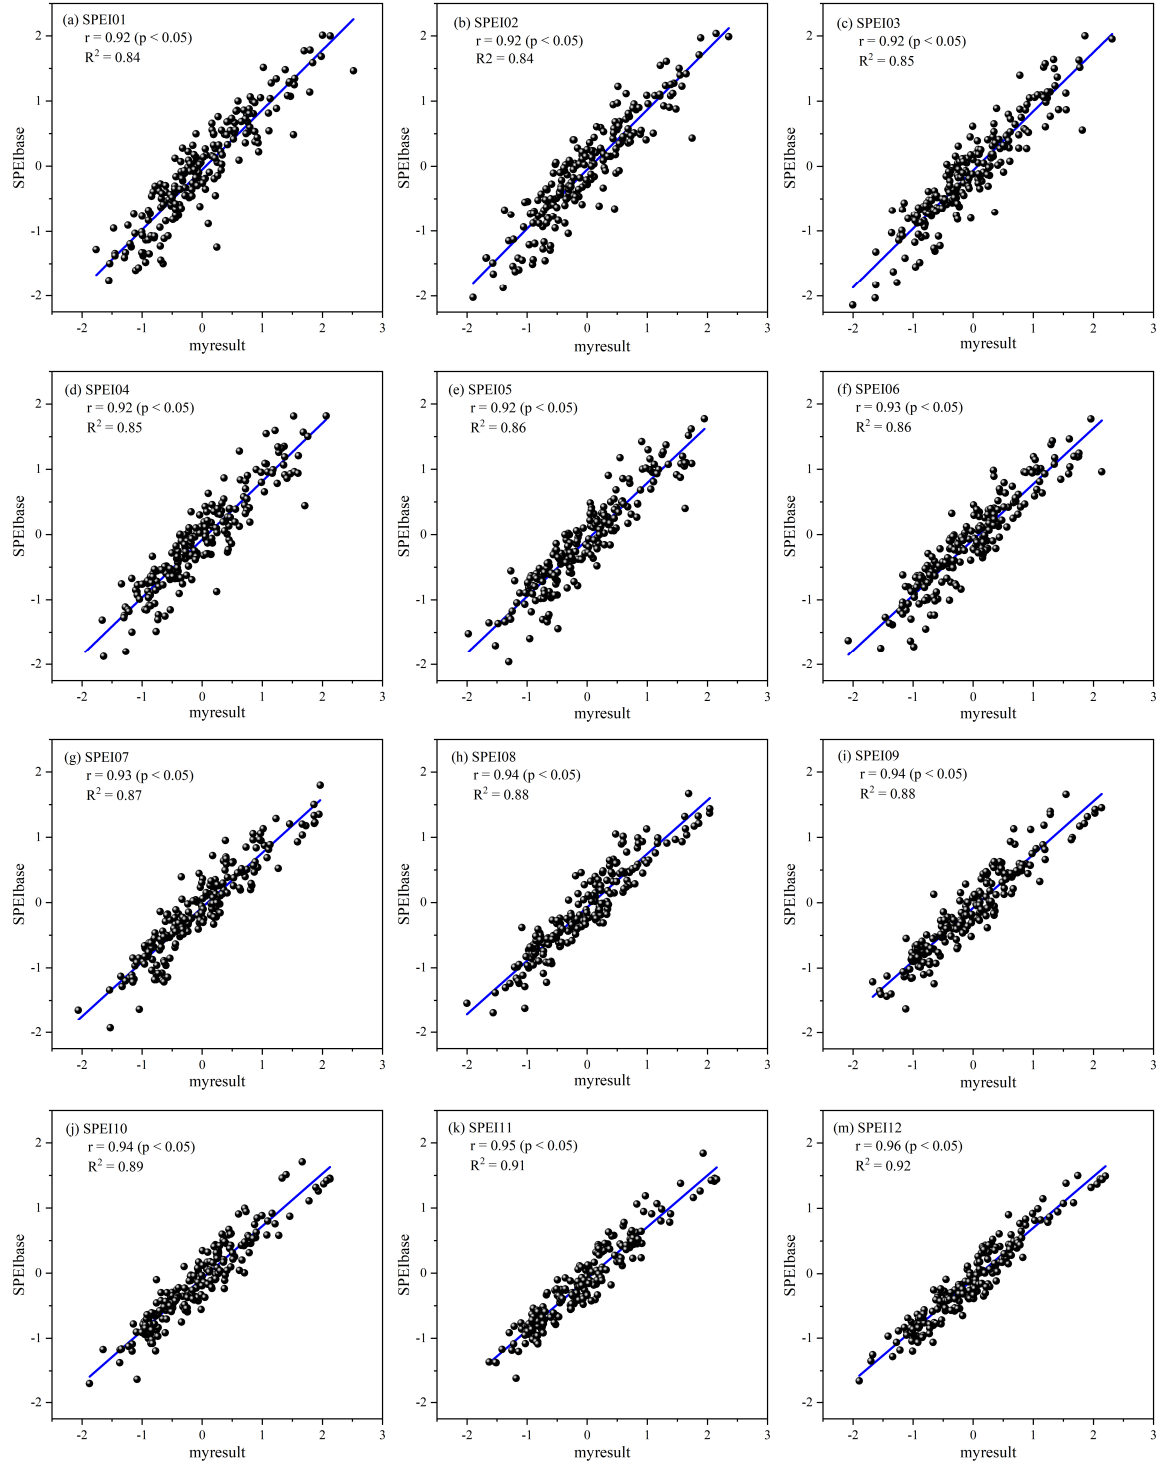

**Figure S1.** Correlation of the drought index results calculated in this study with SPEIbase v2.5.

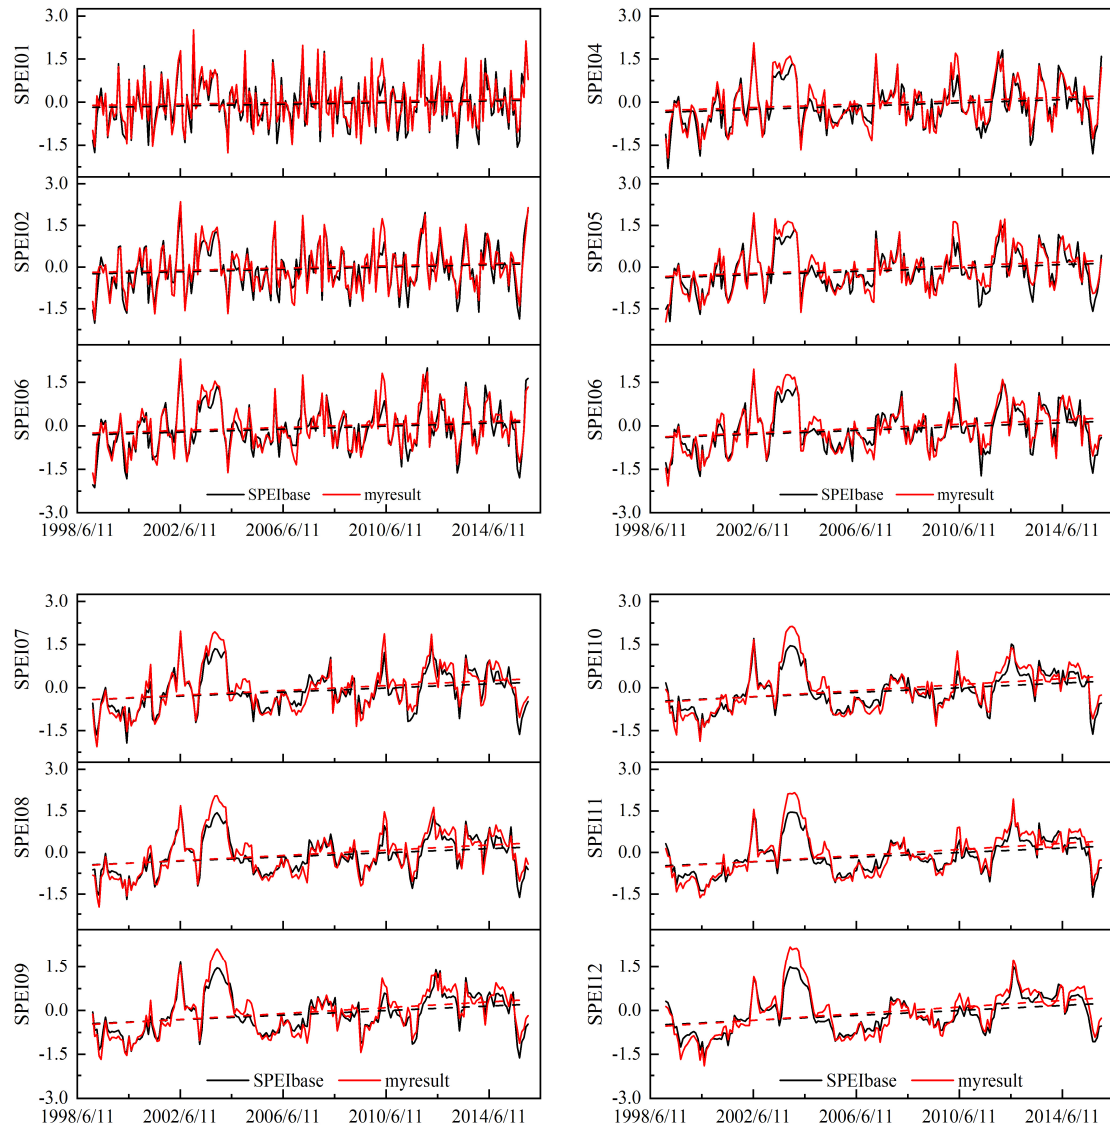

**Figure S2.** Comparison of the time trends between the drought index results calculated in this paper and SPEIbase v2.5.

**Table S1.** Vegetation cover type re-classification.

| Reclassification   | Classification     | Subclass                                                           |
|--------------------|--------------------|--------------------------------------------------------------------|
| Needleleaf forests | Needleleaf forests | Cold-temperate and temperate montane coniferous forests            |
|                    |                    | Temperate coniferous forests                                       |
|                    |                    | Subtropical coniferous forests                                     |
|                    |                    | Subtropical and tropical montane coniferous forests                |
| Broadleaf forests  | Broadleaf forests  | Temperate deciduous broad-leaved forests                           |
|                    |                    | Temperate deciduous small-leaved open forests                      |
|                    |                    | Subtropical deciduous broad-leaved forests                         |
|                    |                    | Subtropical and tropical bamboo forests and bamboo thickets        |
| Shrubs             | Shrubs             | Temperate deciduous scrub                                          |
|                    |                    | Subtropical and tropical broad-leaved evergreen and deciduous      |
|                    |                    | Subalpine deciduous broad-leaved scrub                             |
|                    |                    | Subalpine sclerophyllous evergreen broad-leaved scrub              |
|                    |                    | Subalpine evergreen coniferous scrub                               |
| Grasses            | Grassland          | Temperate grassland and mixed grass meadows                        |
|                    |                    | Temperate grass grassland typical grassland                        |
|                    |                    | Temperate dwarf grasses, dwarf semi-shrub desert grasses           |
|                    |                    | Alpine grassland, tussock grassland                                |
|                    | Grass              | Temperate grasses                                                  |
|                    | Meadow             | Subtropical and tropical grasses                                   |
|                    |                    | Temperate grasses, miscellaneous grass meadows                     |
|                    |                    | Temperate grasses, mosses and miscellaneous grasses swampy grasses |
|                    |                    | Temperate grasses and miscellaneous grasses saline meadows         |
|                    |                    | Alpine tussock grass, miscellaneous grass meadow                   |
| Alpine forests     | Alpine forests     | Alpine sparse vegetation                                           |
| Cultivated forests | Cultivated forests | Annual short-fertility cold-tolerant crops (no fruit trees)        |
|                    |                    | Annual ripening food crops and hardy cash crops                    |
|                    |                    | monocultures and hardy cash crops                                  |
|                    |                    | Two years or two years of dry crops and deciduous fruit            |
